# Supplementary material for: Psychological, pharmacological, and combined smoking cessation interventions for smokers with current depression: A systematic review and meta-analysis
Source: PLoS One. 2017 Dec 5;12(12):e0188849. doi: 10.1371/journal.pone.0188849 (PMC5716554; doi:10.1371/journal.pone.0188849)
Supplement: S1 Dataset — (XLSX) [file pone.0188849.s002.xlsx]

## Sheet: Hoja1
Author	Year	Sample Size	% of females	Age (Mean - SD)	Cigarettes (Mean - SD)	Conditions	Type of intervention effect analyzed	Setting	Short-term Abstinenceb (Experimental vs Comparison)	Long-term Abstinencec (Experimental vs Comparison)	Biochemical validation	Point Prevalence	Continuous abstinence	Prolonged abstinence	Depression assessment: Interview	Depression diagnosis	Depression scale	Depressive symptoms in BL (mean)	Depressive symptoms at the end-of-treatment in experimental conditiond (mean)
Anthenelli	2013	525	62.7	46.27±10.85	21.70±8.12	Varenicline vs Placebo (both with counseling)	Pharmacology	Academic clinical trial centers and smoking cessation clinics	46.1% - 20.1%	28.5% - 17.47%	Yes	Yes	Yes	No	SCID	-	MADRS	7.76	-
Bernard	2015	70	58.6	48.45±10.45	21.45±8.90	Exercise and Counseling vs Health Education Control (both with NRT or Varenicline)	Psychosocial	Montpellier University Hospital	48.6% - 28.6%	20.0% - 11.43%	Yes	No	Yes	No	MINI	MDD (7.1%)	HADS-D	10.45	3.87
Catley	2003	498	60.0	42.95±10.40	19.80±10.20	Culturally sensitive material (guide + video) vs Standard material (guide + video) (both with NRT)	Psychosocial	Inner-city hospital	-	-	No	Yes	No	No	-	-	SDS	0.16	0.14
Cinciripini	2010	257	100.0	25.00±5.90	16.30±9.00	CBASP vs HW (both with counseling)	Psychosocial	Clinic	36.7% - 31%	17.97% - 16.28%	Yes	Yes	Yes	Yes	SCID	MDD (23.3%)	CES-D	18.8	-
Evins	2008	199	49.0	43.00±11.00	25.00±11.00	Bupropion vs Placebo (both with CBT + NRT)	Pharmacology	Hospital	38.1% - 31.4%	-	Yes	Yes	No	No	SCID	MDD (34.2%)	HAM-D	10.6	10.55*
Hall	2006	322	69.6	41.84±12.60	15.55±10.15	Staged Care Intervention (NRT and bupropion under request) vs Brief Contact Control	Psychosocial	Mental health outpatient clinics	13.5% - 9.4%	14.11% - 9.43%	Yes	Yes	No	No	PRIME-MD	MDD (83.2%) MDD-R (52.2%)	BDI-II	21.0	-
Hayes	2010	237	53.6	56.13±14.08	21.11±14.00	Standard Care vs Motivational Enhancement	Psychosocial	Home visits	9.5% - 9.3%	14.03 % - 10%	Yes	Yes	Yes	No	-	-	CES-D	21.21	-
Japuntich	2007	71	64.8	41.25±11.55	28.75±10.74	Motivational interviewing vs CBT (both with NRT and brief individual counselling)	Psychosocial	Clinic	-	-	Yes	Yes	No	No	PRIME-MD	MDD (100%)	-	-	-
Kinnunen	2008	196	56.1	38.5±11.3	23.5±11.1	Nicotine gum (NRT) vs Placebo gum (both with brief behavioral counselling)	Pharmacology	Harvard School of Dental Medicine	-	15.08% - 5.71%	Yes	No	Yes	No	-	-	CES-D	24.7	-
Minami	2015	45	48.9	46.1±11.5	-	ST-Fluoxetine vs SEQ-Fluoxetine vs NRT (all with counseling + NRT)	Pharmacology	Medical context	64.3% - 58.8%	28.57% - 23.53%	No	Yes	No	No	SCID	-	CES-D	16.07	-
Muñoz	1997	136	38.2	35.3	14.1±8.2	Guide vs Guide + MM22 (both with two conditions: delayed and immediate)	Psychosocial	Self-help	22.5% - 10.7%	25.35% - 9.23%	Yes	Yes	No	No	MV-DIS	MDD (39.0%)	CES-D	21.3	14.0
Muñoz study 3	2006	280	67.9	38.4±10.8	20.3±9.7	Guide+ ITEMs vs Guía + ITEMs + MM (both suggested using NRT)	Psychosocial	Internet based self-help	12.2% - 12.1%	8.63% - 17.02%	No	Yes	No	No	MDE screener	MDD (11.4%)	CES-D	16.2	-
Muñoz study 4	2006	288	41.3	35.0±9.5	22.8±10.2	Guía + ITEMs vs Guía + ITEMs + MM (both suggested using NRT)	Psychosocial	Internet based self-help	19.7% - 28.1%	20.42% - 22.60%	No	Yes	No	No	MDE screener	MDD (16.7%)	CES-D	15.9	-
Muñoz	2009	1000	45.0	37.9±11.3	19.8±10.1	Guía vs Guía+ITEMs vs Guía+ITEMs+MM vs Guía+ITEMS+MM+VG (both suggested using NRT)	Psychosocial	Internet based self-help	14.9% - 17.3%	19.32% - 21.88%	No	Yes	No	No	MDE screener	MDD (12.9%)	CES-D	16.0	-
Patten	2017	30	100.0	37.5±10.5	-	Exercise vs Health Education (both with counselling and NRT)	Psychosocial	Clinic	73.3% - 33.3%	26.67% - 40.0%	Yes	Yes	No	No	.	-	PHQ-9	11.7	7.4
Schnoll	2010	55	63.63	51.67	17.52	Bupropion vs Placebo (both with counseling and NRT)	Pharmacology	Not described	14.3% - 7.4%	14.28% - 7.41%	Yes	Yes	No	No	-	-	CES-D	-	-
Thorsteinsson	2001	38	47.4	46.26±9.6	28	NRT vs Placebo (both with counseling)	Pharmacology	Not described	77.8% - 50%	-	Yes	Yes	No	No	SCID	MDD (100%)	HAM-D ; BDI	18.1 ; 20.9	-
van der Meer	2010	485	76.5	43.75±10.05	21.60±9.30	Mood Management intervention vs Control (both with counselling and may include NRT, bupropion or nortriptyline)	Psychosocial	Dutch national quitline	-	27.57% - 23.97%	Yes	Yes	No	Yes	-	-	CES-D	16.65	-
Vickers	2009	60	100.0	41.35±11.95	20.8±7.55	Exercise counseling vs Health Education (both with counselling and NRT)	Psychosocial	Clinic	10% - 13.3%	3.33% - 3.33%	Yes	Yes	No	No	-	-	CES-D ; HAM-D	31.1 ; 14.1	7.4 (HAM-D)
Ward	2013	269	21.55	40±11.4	27.74±12.69	Nicotine patch vs Placebo (both with behavioral cessation counseling and brief telephone support)	Pharmacology	Primary care clinics	25.4% - 25.9%	20.15% - 14.8%	Yes	Yes	No	Yes	-	-	CES-D	18.04	-
Note. MADRS = Montgomery–Åsberg Depression Rating Scale; SCID = Structured Clinical Interview for DSM Disorders; HADS-D = Hospital Anxiety and Depression Scale-Depression; MINI = Mini International Neuropsychiatric Interview; MDD = Major depressive disorder; NRT = Nicotine Replacement Therapy; SDS = Short Depression Screen; CES-D = Center for Epidemiological Studies-Depression; CBASP = Cognitive …
aOnly depressed smokers.
b Short-term abstinence (≤ 3 months), the longest abstinence rate was selected.
c Long-term abstinence (6 - 12 months), the longest abstinence rate was selected.
* mean of total sample
